# Supplementary material for: A Predictive and an Optimization Mathematical Model for Device Design in Cardiac Pulsed Field Ablation Using Design of Experiments
Source: MDPI journal article supplement (doi:10.3390/jcdd10100423), 2023-10-11

## **Supplementary Material**

# **A Predictive and an Optimization Mathematical Model for Device Design in Cardiac Pulsed Field Ablation using Design of Experiments**

**Eoghan Dunne, Jara M. Baena-Montes, Kevin Donaghey, Cormac Clarke, Marcin J. Kraśny, Bilal Amin,  
Tony O'Halloran, Leo R. Quinlan, Adnan Elahi and Martin O'Halloran**

## S1: DoE Run Order

Table S1: Run order for the DoE performed.

| Std Order | Run Order | Center Point | Blocks | Electrode Width (mm) | Electrode Spacing c-c (mm) | Input Voltage (V) | Number of Ablation Repeats |
|-----------|-----------|--------------|--------|----------------------|----------------------------|-------------------|----------------------------|
| 17        | 1         | 1            | 3      | 1.5                  | 6                          | 1000              | 4                          |
| 18        | 2         | 1            | 3      | 1.2                  | 8                          | 1000              | 4                          |
| 21        | 3         | 1            | 3      | 1.2                  | 6                          | 1000              | 8                          |
| 23        | 4         | 1            | 3      | 1.5                  | 6                          | 1300              | 8                          |
| 20        | 5         | 1            | 3      | 1.5                  | 8                          | 1300              | 4                          |
| 19        | 6         | 1            | 3      | 1.2                  | 6                          | 1300              | 4                          |
| 24        | 7         | 1            | 3      | 1.2                  | 8                          | 1300              | 8                          |
| 22        | 8         | 1            | 3      | 1.5                  | 8                          | 1000              | 8                          |
| 30        | 9         | 1            | 4      | 1.2                  | 8                          | 1000              | 8                          |
| 32        | 10        | 1            | 4      | 1.5                  | 8                          | 1300              | 8                          |
| 29        | 11        | 1            | 4      | 1.5                  | 6                          | 1000              | 8                          |
| 31        | 12        | 1            | 4      | 1.2                  | 6                          | 1300              | 8                          |
| 28        | 13        | 1            | 4      | 1.2                  | 8                          | 1300              | 4                          |
| 26        | 14        | 1            | 4      | 1.5                  | 8                          | 1000              | 4                          |
| 27        | 15        | 1            | 4      | 1.5                  | 6                          | 1300              | 4                          |
| 25        | 16        | 1            | 4      | 1.2                  | 6                          | 1000              | 4                          |
| 6         | 17        | 1            | 1      | 1.5                  | 8                          | 1000              | 8                          |
| 8         | 18        | 1            | 1      | 1.2                  | 8                          | 1300              | 8                          |
| 4         | 19        | 1            | 1      | 1.5                  | 8                          | 1300              | 4                          |
| 7         | 20        | 1            | 1      | 1.5                  | 6                          | 1300              | 8                          |
| 2         | 21        | 1            | 1      | 1.2                  | 8                          | 1000              | 4                          |
| 1         | 22        | 1            | 1      | 1.5                  | 6                          | 1000              | 4                          |
| 3         | 23        | 1            | 1      | 1.2                  | 6                          | 1300              | 4                          |
| 5         | 24        | 1            | 1      | 1.2                  | 6                          | 1000              | 8                          |
| 14        | 25        | 1            | 2      | 1.2                  | 8                          | 1000              | 8                          |
| 9         | 26        | 1            | 2      | 1.2                  | 6                          | 1000              | 4                          |
| 16        | 27        | 1            | 2      | 1.5                  | 8                          | 1300              | 8                          |
| 11        | 28        | 1            | 2      | 1.5                  | 6                          | 1300              | 4                          |
| 15        | 29        | 1            | 2      | 1.2                  | 6                          | 1300              | 8                          |
| 12        | 30        | 1            | 2      | 1.2                  | 8                          | 1300              | 4                          |
| 13        | 31        | 1            | 2      | 1.5                  | 6                          | 1000              | 8                          |
| 10        | 32        | 1            | 2      | 1.5                  | 8                          | 1000              | 4                          |

## S2: Ablation Images for Blocks 2, 3, and 4 (Runs 1 to 32)

Block 3

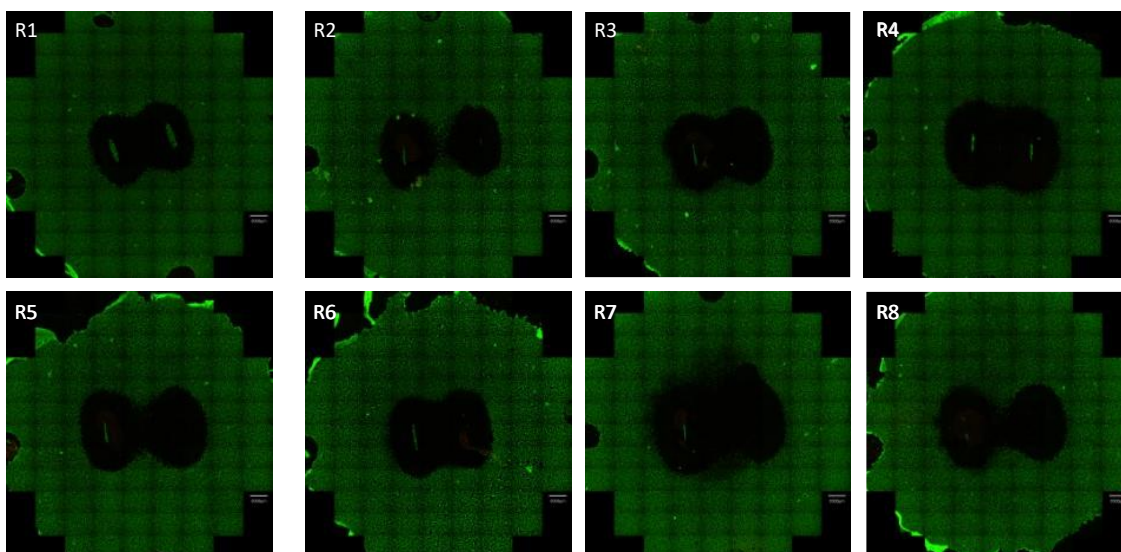

(a)

Block 4

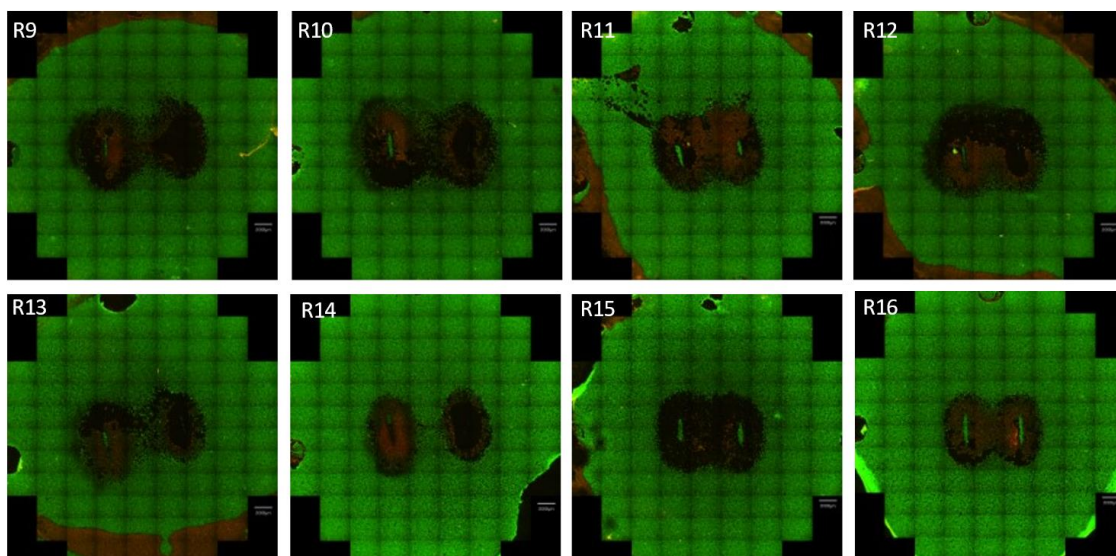

(b)

Block 2

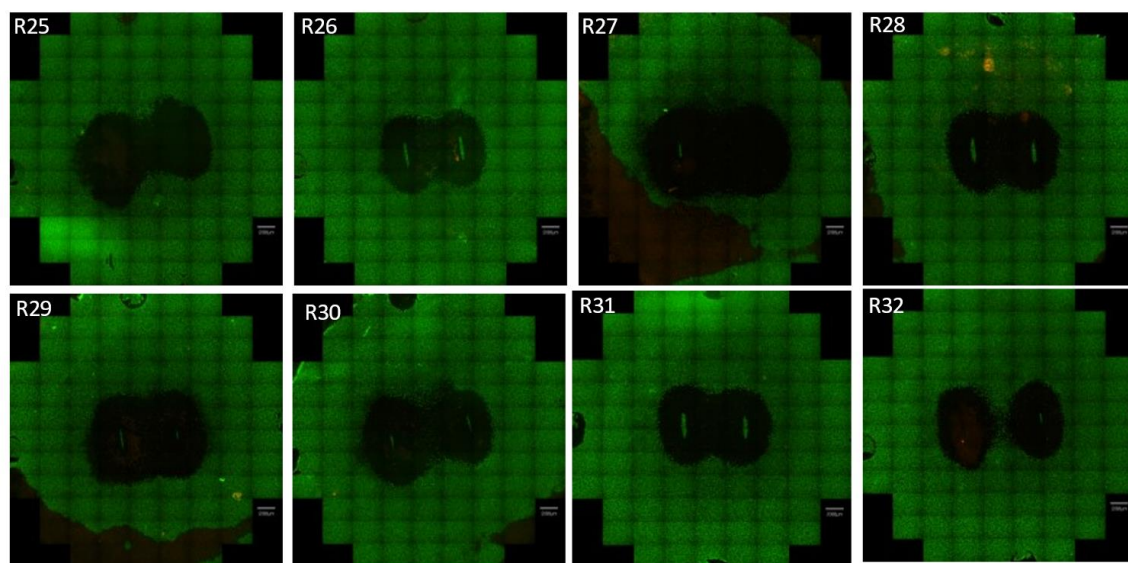

(c)

Figure S1: Ablated cells in well for each of the runs in Blocks 2, 3, and 4. Each image has the run number in the top right corner. The images are in order of ascending run number. Block 1 is presented in the paper. Grouping of images: (a) Block 3; (b) Block 4; (c) Block 2

### S3: Measured Areas and Center Widths Per Run

Table S2: The Measured Areas and Centre Widths Per Run.

| Run Order | Blocks | Electrode Width (mm) | Electrode Spacing c-c (mm) | Input Voltage (V) | Number of Ablation Repeats | Area (mm <sup>2</sup> ) | Center Width (mm) |
|-----------|--------|----------------------|----------------------------|-------------------|----------------------------|-------------------------|-------------------|
| 1         | 3      | 1.5                  | 6                          | 1000              | 4                          | 78.844                  | 6.065             |
| 2         | 3      | 1.2                  | 8                          | 1000              | 4                          | 82.621                  | 1.179             |
| 3         | 3      | 1.2                  | 6                          | 1000              | 8                          | 92.652                  | 6.979             |
| 4         | 3      | 1.5                  | 6                          | 1300              | 8                          | 115.289                 | 9.003             |
| 5         | 3      | 1.5                  | 8                          | 1300              | 4                          | 110.472                 | 4.983             |
| 6         | 3      | 1.2                  | 6                          | 1300              | 4                          | 93.139                  | 7.469             |
| 7         | 3      | 1.2                  | 8                          | 1300              | 8                          | 134.893                 | 8.037             |
| 8         | 3      | 1.5                  | 8                          | 1000              | 8                          | 108.61                  | 4.53              |
| 9         | 4      | 1.2                  | 8                          | 1000              | 8                          | 100.771                 | 2.611             |
| 10        | 4      | 1.5                  | 8                          | 1300              | 8                          | 118.351                 | 6.251             |
| 11        | 4      | 1.5                  | 6                          | 1000              | 8                          | 90.964                  | 5.933             |
| 12        | 4      | 1.2                  | 6                          | 1300              | 8                          | 93.343                  | 6.702             |
| 13        | 4      | 1.2                  | 8                          | 1300              | 4                          | 97.258                  | 4.157             |
| 14        | 4      | 1.5                  | 8                          | 1000              | 4                          | 70.369                  | 0                 |
| 15        | 4      | 1.5                  | 6                          | 1300              | 4                          | 91.099                  | 7.412             |
| 16        | 4      | 1.2                  | 6                          | 1000              | 4                          | 73.082                  | 5.135             |
| 17        | 1      | 1.5                  | 8                          | 1000              | 8                          | 101.23                  | 2.771             |
| 18        | 1      | 1.2                  | 8                          | 1300              | 8                          | 128.282                 | 6.909             |
| 19        | 1      | 1.5                  | 8                          | 1300              | 4                          | 103.985                 | 4.435             |
| 20        | 1      | 1.5                  | 6                          | 1300              | 8                          | 107.71                  | 8.472             |
| 21        | 1      | 1.2                  | 8                          | 1000              | 4                          | 70.09                   | 1.537             |
| 22        | 1      | 1.5                  | 6                          | 1000              | 4                          | 63.428                  | 5.016             |
| 23        | 1      | 1.2                  | 6                          | 1300              | 4                          | 91.225                  | 7.325             |
| 24        | 1      | 1.2                  | 6                          | 1000              | 8                          | 86.142                  | 5.504             |
| 25        | 2      | 1.2                  | 8                          | 1000              | 8                          | 115.906                 | 5.555             |
| 26        | 2      | 1.2                  | 6                          | 1000              | 4                          | 88.626                  | 6.624             |
| 27        | 2      | 1.5                  | 8                          | 1300              | 8                          | 128.377                 | 8.08              |
| 28        | 2      | 1.5                  | 6                          | 1300              | 4                          | 92.227                  | 7.418             |
| 29        | 2      | 1.2                  | 6                          | 1300              | 8                          | 106.898                 | 8.519             |
| 30        | 2      | 1.2                  | 8                          | 1300              | 4                          | 104.998                 | 6.008             |
| 31        | 2      | 1.5                  | 6                          | 1000              | 8                          | 85.247                  | 6.424             |
| 32        | 2      | 1.5                  | 8                          | 1000              | 4                          | 82.644                  | 1.212             |

## S4: Minitab Regression Analysis for Ablation Area and Center Width

### S4.1: Factorial Regression: Area versus Blocks, Electrode Width (mm), Electrode Spacing c-c (mm), Input Voltage (V), Num Ablation Repeats

#### Backward Elimination of Terms

$\alpha$  to remove = 0.1

#### Coded Coefficients

| Term                                            | Effect | Coef   | SE Coef | T-Value | P-Value |
|-------------------------------------------------|--------|--------|---------|---------|---------|
| Constant                                        |        | 97.149 | 0.919   | 105.68  | 0.000   |
| Blocks                                          |        |        |         |         |         |
| 1                                               |        | -3.14  | 1.59    | -1.97   | 0.061   |
| 2                                               |        | 3.47   | 1.59    | 2.18    | 0.040   |
| 3                                               |        | 4.92   | 1.59    | 3.09    | 0.005   |
| Electrode Spacing c-c (mm)                      | 13.059 | 6.529  | 0.919   | 7.10    | 0.000   |
| Input Voltage (V)                               | 20.395 | 10.198 | 0.919   | 11.09   | 0.000   |
| Num Ablation Repeats                            | 20.035 | 10.017 | 0.919   | 10.90   | 0.000   |
| Electrode Spacing c-c (mm)*Input Voltage (V)    | 3.902  | 1.951  | 0.919   | 2.12    | 0.045   |
| Electrode Spacing c-c (mm)*Num Ablation Repeats | 6.713  | 3.357  | 0.919   | 3.65    | 0.001   |

| Term                                            | VIF  |
|-------------------------------------------------|------|
| Constant                                        |      |
| Blocks                                          |      |
| 1                                               | 1.50 |
| 2                                               | 1.50 |
| 3                                               | 1.50 |
| Electrode Spacing c-c (mm)                      | 1.00 |
| Input Voltage (V)                               | 1.00 |
| Num Ablation Repeats                            | 1.00 |
| Electrode Spacing c-c (mm)*Input Voltage (V)    | 1.00 |
| Electrode Spacing c-c (mm)*Num Ablation Repeats | 1.00 |

#### Model Summary

| S       | R-sq   | R-sq(adj) | R-sq(pred) |
|---------|--------|-----------|------------|
| 5.20040 | 93.52% | 91.26%    | 87.45%     |

#### Analysis of Variance

| Source                                          | DF | Adj SS | Adj MS  | F-Value | P-Value |
|-------------------------------------------------|----|--------|---------|---------|---------|
| Model                                           | 8  | 8973.6 | 1121.71 | 41.48   | 0.000   |
| Blocks                                          | 3  | 588.2  | 196.08  | 7.25    | 0.001   |
| Linear                                          | 3  | 7903.1 | 2634.36 | 97.41   | 0.000   |
| Electrode Spacing c-c (mm)                      | 1  | 1364.3 | 1364.27 | 50.45   | 0.000   |
| Input Voltage (V)                               | 1  | 3327.6 | 3327.65 | 123.04  | 0.000   |
| Num Ablation Repeats                            | 1  | 3211.2 | 3211.17 | 118.74  | 0.000   |
| 2-Way Interactions                              | 2  | 482.3  | 241.16  | 8.92    | 0.001   |
| Electrode Spacing c-c (mm)*Input Voltage (V)    | 1  | 121.8  | 121.80  | 4.50    | 0.045   |
| Electrode Spacing c-c (mm)*Num Ablation Repeats | 1  | 360.5  | 360.51  | 13.33   | 0.001   |
| Error                                           | 23 | 622.0  | 27.04   |         |         |
| Total                                           | 31 | 9595.7 |         |         |         |

Regression Equation in Uncoded Units

Area = 118.4 - 18.50 Electrode Spacing c-c (mm) - 0.0231 Input Voltage (V)  
- 6.74 Num Ablation Repeats + 0.01301 Electrode Spacing c-c (mm)\*Input Voltage (V)  
+ 1.678 Electrode Spacing c-c (mm)\*Num Ablation Repeats

Equation averaged over blocks.

Fits and Diagnostics for Unusual Observations

| Obs | Area  | Fit   | Resid | Std Resid |
|-----|-------|-------|-------|-----------|
| 22  | 63.43 | 72.57 | -9.15 | -2.07 R   |
| 26  | 88.63 | 79.18 | 9.45  | 2.14 R    |

R Large residual

Alias Structure

| Factor | Name                       |
|--------|----------------------------|
| A      | Electrode Width (mm)       |
| B      | Electrode Spacing c-c (mm) |
| C      | Input Voltage (V)          |
| D      | Num Ablation Repeats       |

Aliases

I  
Block 1 - ABCD  
Block 2 + ABCD  
Block 3 - ABCD  
B  
C  
D  
BC  
BD

## Pareto Chart of the Standardized Effects

(response is Area,  $\alpha = 0.1$ )

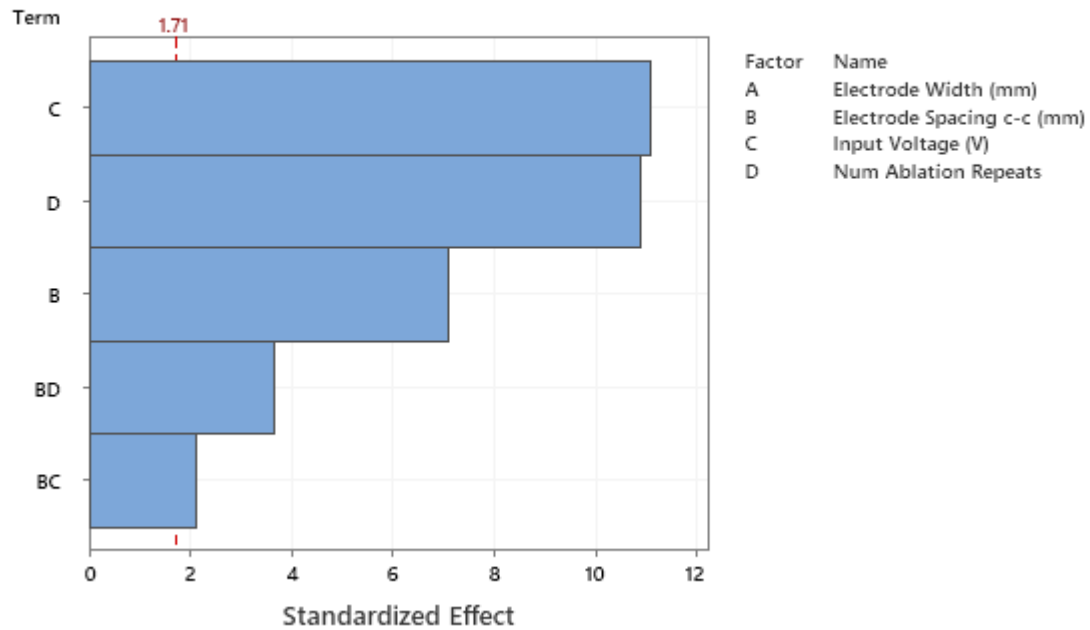

## Residual Plots for Area

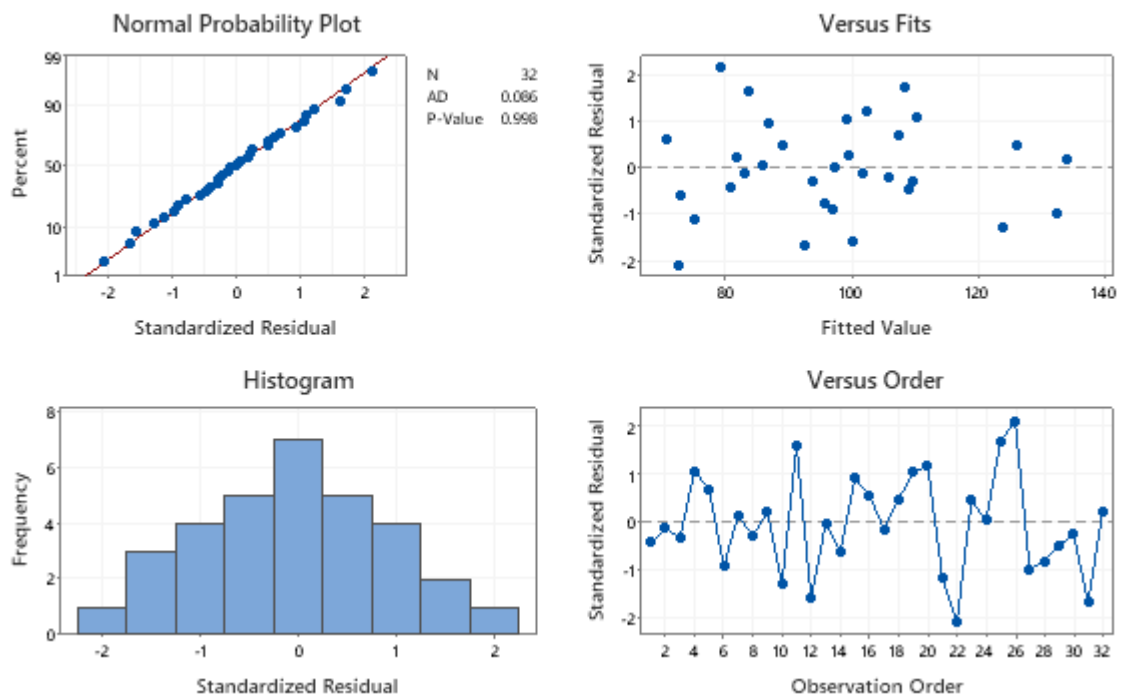



## S4.2: Factorial Regression: Centerwidth (manual) versus Blocks, Electrode Width (mm), Electrode Spacing c-c (mm), Input Voltage (V), Num Ablation Repeats

### Backward Elimination of Terms

$\alpha$  to remove = 0.1

### Coded Coefficients

| Term                                            | Effect  | Coef    | SE Coef | T-Value | P-Value |
|-------------------------------------------------|---------|---------|---------|---------|---------|
| Constant                                        |         | 5.5705  | 0.0983  | 56.70   | 0.000   |
| Blocks                                          |         |         |         |         |         |
| 1                                               |         | -0.324  | 0.170   | -1.91   | 0.069   |
| 2                                               |         | 0.660   | 0.170   | 3.88    | 0.001   |
| 3                                               |         | 0.460   | 0.170   | 2.70    | 0.013   |
| Electrode Spacing c-c (mm)                      | -2.6091 | -1.3045 | 0.0983  | -13.28  | 0.000   |
| Input Voltage (V)                               | 2.7566  | 1.3783  | 0.0983  | 14.03   | 0.000   |
| Num Ablation Repeats                            | 1.6441  | 0.8220  | 0.0983  | 8.37    | 0.000   |
| Electrode Spacing c-c (mm)*Input Voltage (V)    | 0.9266  | 0.4633  | 0.0983  | 4.72    | 0.000   |
| Electrode Spacing c-c (mm)*Num Ablation Repeats | 1.0101  | 0.5050  | 0.0983  | 5.14    | 0.000   |

| Term                                            | VIF  |
|-------------------------------------------------|------|
| Constant                                        |      |
| Blocks                                          |      |
| 1                                               | 1.50 |
| 2                                               | 1.50 |
| 3                                               | 1.50 |
| Electrode Spacing c-c (mm)                      | 1.00 |
| Input Voltage (V)                               | 1.00 |
| Num Ablation Repeats                            | 1.00 |
| Electrode Spacing c-c (mm)*Input Voltage (V)    | 1.00 |
| Electrode Spacing c-c (mm)*Num Ablation Repeats | 1.00 |

### Model Summary

| S        | R-sq   | R-sq(adj) | R-sq(pred) |
|----------|--------|-----------|------------|
| 0.555800 | 95.82% | 94.37%    | 91.91%     |

### Analysis of Variance

| Source                                          | DF | Adj SS  | Adj MS  | F-Value | P-Value |
|-------------------------------------------------|----|---------|---------|---------|---------|
| Model                                           | 8  | 162.976 | 20.3720 | 65.95   | 0.000   |
| Blocks                                          | 3  | 11.076  | 3.6920  | 11.95   | 0.000   |
| Linear                                          | 3  | 136.870 | 45.6234 | 147.69  | 0.000   |
| Electrode Spacing c-c (mm)                      | 1  | 54.458  | 54.4577 | 176.29  | 0.000   |
| Input Voltage (V)                               | 1  | 60.789  | 60.7891 | 196.78  | 0.000   |
| Num Ablation Repeats                            | 1  | 21.624  | 21.6235 | 70.00   | 0.000   |
| 2-Way Interactions                              | 2  | 15.030  | 7.5150  | 24.33   | 0.000   |
| Electrode Spacing c-c (mm)*Input Voltage (V)    | 1  | 6.868   | 6.8681  | 22.23   | 0.000   |
| Electrode Spacing c-c (mm)*Num Ablation Repeats | 1  | 8.162   | 8.1618  | 26.42   | 0.000   |
| Error                                           | 23 | 7.105   | 0.3089  |         |         |
| Total                                           | 31 | 170.081 |         |         |         |

### Regression Equation in Uncoded Units

Centrewidth  
(manual)

= 37.14 - 6.371 Electrode Spacing c-c (mm)  
- 0.01243 Input Voltage (V)  
- 1.357 Num Ablation Repeats  
+ 0.003089 Electrode Spacing c-c (mm)\*Input Voltage (V)  
+ 0.2525 Electrode Spacing c-c (mm)\*Num Ablation Repeats

Equation averaged over blocks.

Fits and Diagnostics for Unusual Observations

| Centrewidth |          | Fit   | Resid | Std Resid |   |
|-------------|----------|-------|-------|-----------|---|
| Obs         | (manual) |       |       |           |   |
| 25          | 5.555    | 4.411 | 1.144 | 2.43      | R |

R Large residual

Alias Structure

| Factor | Name                       |
|--------|----------------------------|
| A      | Electrode Width (mm)       |
| B      | Electrode Spacing c-c (mm) |
| C      | Input Voltage (V)          |
| D      | Num Ablation Repeats       |

Aliases

- I
- Block 1 - ABCD
- Block 2 + ABCD
- Block 3 - ABCD
- B
- C
- D
- BC
- BD

## Pareto Chart of the Standardized Effects

(response is Centrewidth (manual),  $\alpha = 0.1$ )

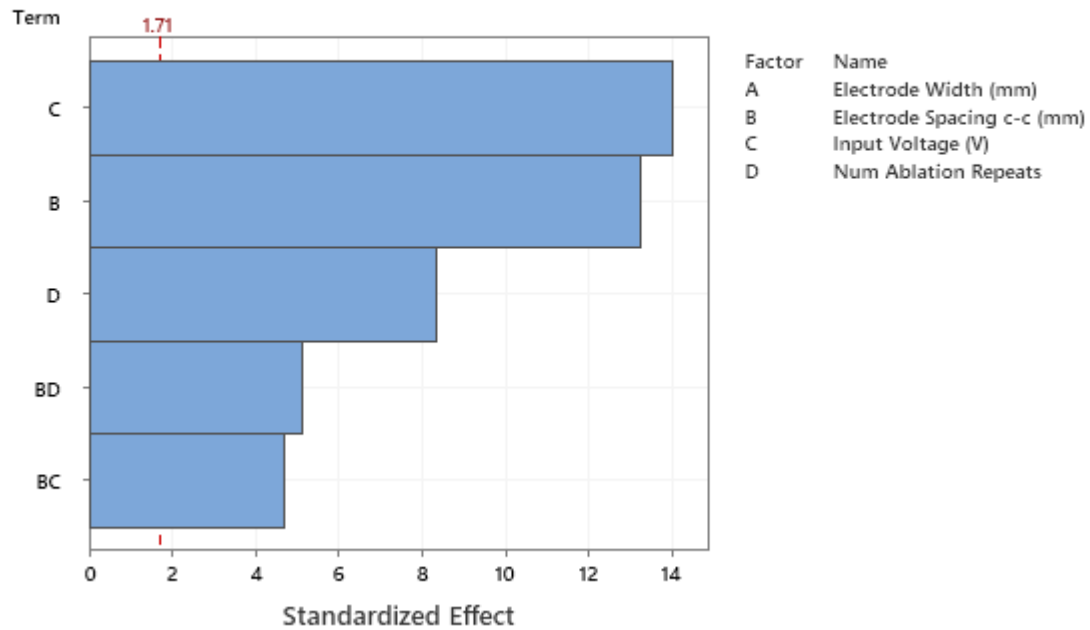

## Residual Plots for Centrewidth (manual)

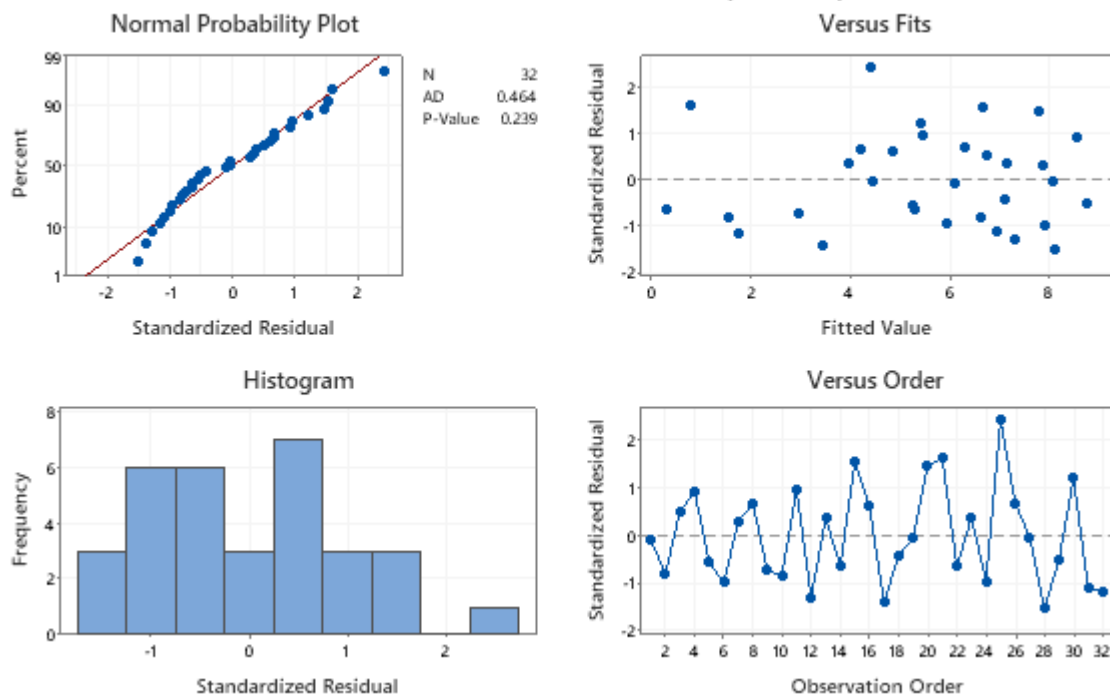

## S5: Confirmation Run Optimisation – Minitab Analysis

### S5.1. Response Optimization: Area 97 mm<sup>2</sup> 1000 V

#### Parameters

| Response | Goal   | Lower  | Target | Upper   | Weight | Importance |
|----------|--------|--------|--------|---------|--------|------------|
| Area     | Target | 63.428 | 97     | 134.893 | 1      | 1          |

#### Variable Ranges

| Variable                   | Values |
|----------------------------|--------|
| Electrode Spacing c-c (mm) | 8      |
| Input Voltage (V)          | 1000   |
| Num Ablation Repeats       | (4, 8) |

#### Solution

| Solution | Electrode Spacing c-c (mm) | Input Voltage (V) | Num Ablation Repeats | Area Fit | Composite Desirability |
|----------|----------------------------|-------------------|----------------------|----------|------------------------|
| 1        | 8                          | 1000              | 6.81799              | 97       | 1                      |

#### Multiple Response Prediction

| Variable                   | Setting |
|----------------------------|---------|
| Electrode Spacing c-c (mm) | 8       |
| Input Voltage (V)          | 1000    |
| Num Ablation Repeats       | 6.81799 |

| Response | Fit   | SE Fit | 95% CI          | 95% PI          |
|----------|-------|--------|-----------------|-----------------|
| Area     | 97.00 | 1.91   | (93.04, 100.96) | (85.54, 108.46) |

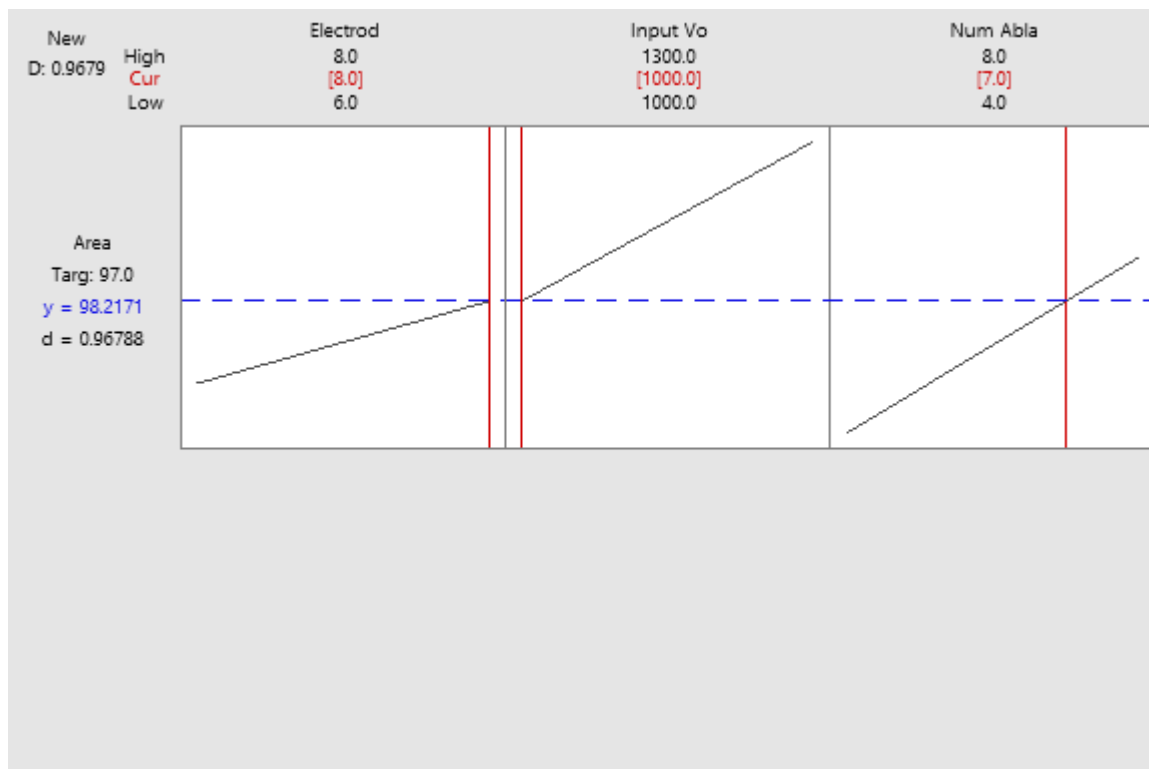

## S5.2. Response Optimization: Area 97 mm<sup>2</sup> 1300 V

### Parameters

| Response | Goal   | Lower  | Target | Upper   | Weight | Importance |
|----------|--------|--------|--------|---------|--------|------------|
| Area     | Target | 63.428 | 97     | 134.893 | 1      | 1          |

### Variable Ranges

| Variable                   | Values |
|----------------------------|--------|
| Electrode Spacing c-c (mm) | 8      |
| Input Voltage (V)          | 1300   |
| Num Ablation Repeats       | (4, 8) |

### Solution

| Solution | Electrode Spacing c-c (mm) | Input Voltage (V) | Num Ablation Repeats | Area Fit | Composite Desirability |
|----------|----------------------------|-------------------|----------------------|----------|------------------------|
| 1        | 8                          | 1300              | 4                    | 102.453  | 0.856093               |

### Multiple Response Prediction

| Variable                   | Setting |        |                 |                 |
|----------------------------|---------|--------|-----------------|-----------------|
| Electrode Spacing c-c (mm) | 8       |        |                 |                 |
| Input Voltage (V)          | 1300    |        |                 |                 |
| Num Ablation Repeats       | 4       |        |                 |                 |
| Response                   | Fit     | SE Fit | 95% CI          | 95% PI          |
| Area                       | 102.45  | 2.25   | (97.79, 107.11) | (90.73, 114.18) |

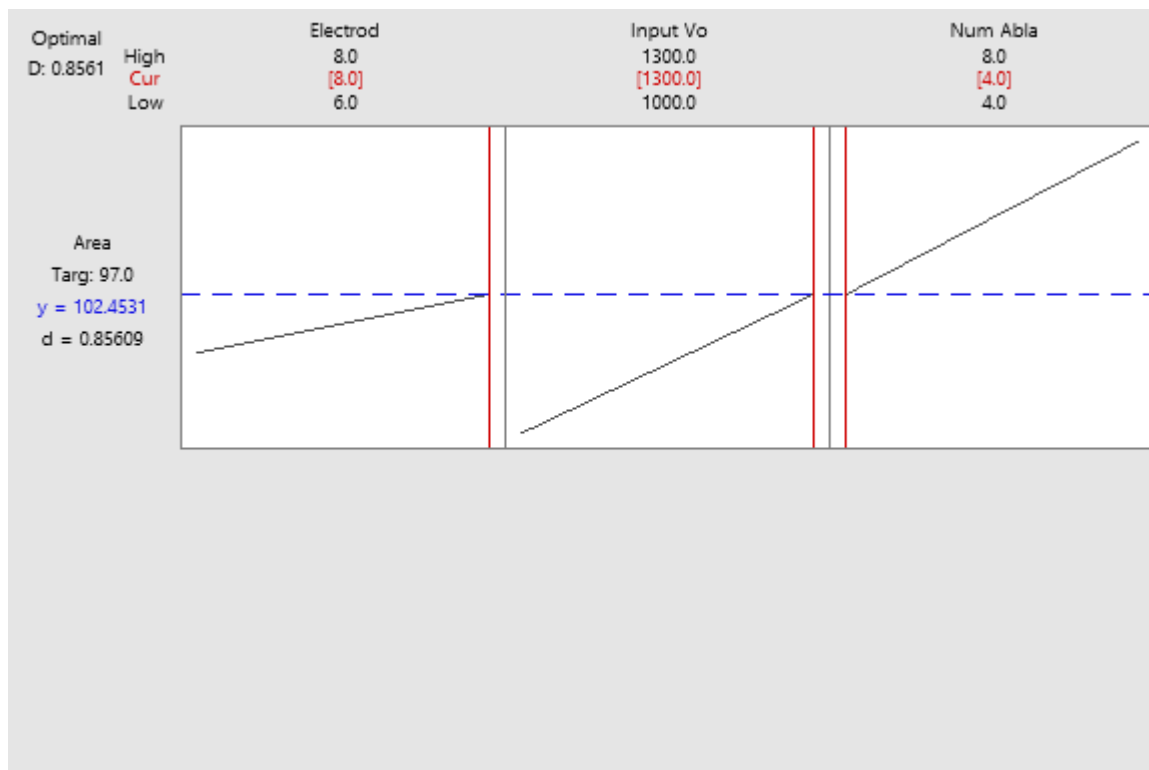

### S5.3: Response Optimization: Area 80 mm2

#### Parameters

| Response | Goal   | Lower  | Target | Upper   | Weight | Importance |
|----------|--------|--------|--------|---------|--------|------------|
| Area     | Target | 63.428 | 80     | 134.893 | 1      | 1          |

#### Variable Ranges

| Variable                   | Values       |
|----------------------------|--------------|
| Electrode Spacing c-c (mm) | 8            |
| Input Voltage (V)          | (1000, 1300) |
| Num Ablation Repeats       | (4, 8)       |

#### Solution

| Solution | Electrode Spacing c-c (mm) | Input Voltage (V) | Num Ablation Repeats | Area Fit | Composite Desirability |
|----------|----------------------------|-------------------|----------------------|----------|------------------------|
| 1        | 8                          | 1000              | 4.27573              | 80       | 1                      |

#### Multiple Response Prediction

| Variable                   | Setting |
|----------------------------|---------|
| Electrode Spacing c-c (mm) | 8       |
| Input Voltage (V)          | 1000    |
| Num Ablation Repeats       | 4.27573 |

| Response | Fit   | SE Fit | 95% CI         | 95% PI         |
|----------|-------|--------|----------------|----------------|
| Area     | 80.00 | 2.15   | (75.55, 84.45) | (68.36, 91.64) |

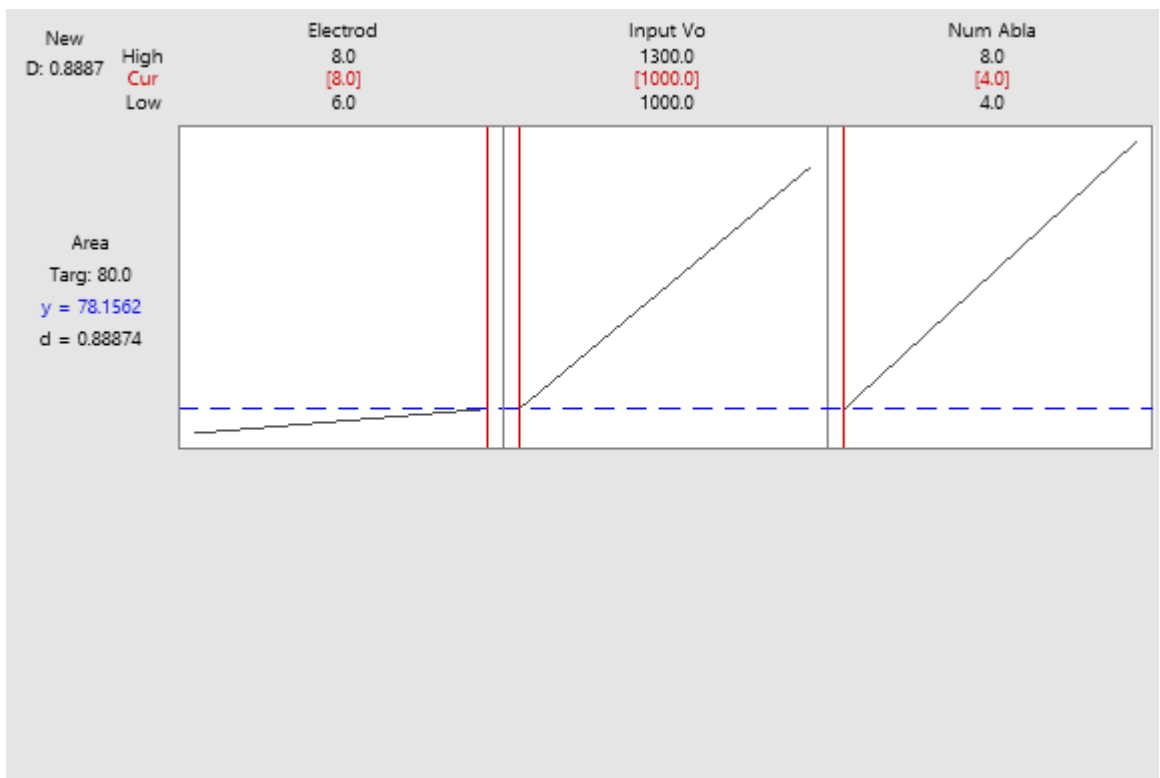

## S5.4: Response Optimization: Area 110 mm2

### Parameters

| Response | Goal   | Lower  | Target | Upper   | Weight | Importance |
|----------|--------|--------|--------|---------|--------|------------|
| Area     | Target | 63.428 | 110    | 134.893 | 1      | 1          |

### Variable Ranges

| Variable                   | Values       |
|----------------------------|--------------|
| Electrode Spacing c-c (mm) | 8            |
| Input Voltage (V)          | (1000, 1300) |
| Num Ablation Repeats       | (4, 8)       |

### Solution

| Solution | Electrode Spacing c-c (mm) | Input Voltage (V) | Num Ablation Repeats | Area Fit | Composite Desirability |
|----------|----------------------------|-------------------|----------------------|----------|------------------------|
| 1        | 8                          | 1150              | 6.94534              | 110      | 1                      |

### Multiple Response Prediction

| Variable                   | Setting |        |                  |                 |
|----------------------------|---------|--------|------------------|-----------------|
| Electrode Spacing c-c (mm) | 8       |        |                  |                 |
| Input Voltage (V)          | 1150    |        |                  |                 |
| Num Ablation Repeats       | 6.94534 |        |                  |                 |
| Response                   | Fit     | SE Fit | 95% CI           | 95% PI          |
| Area                       | 110.00  | 1.44   | (107.03, 112.97) | (98.84, 121.16) |

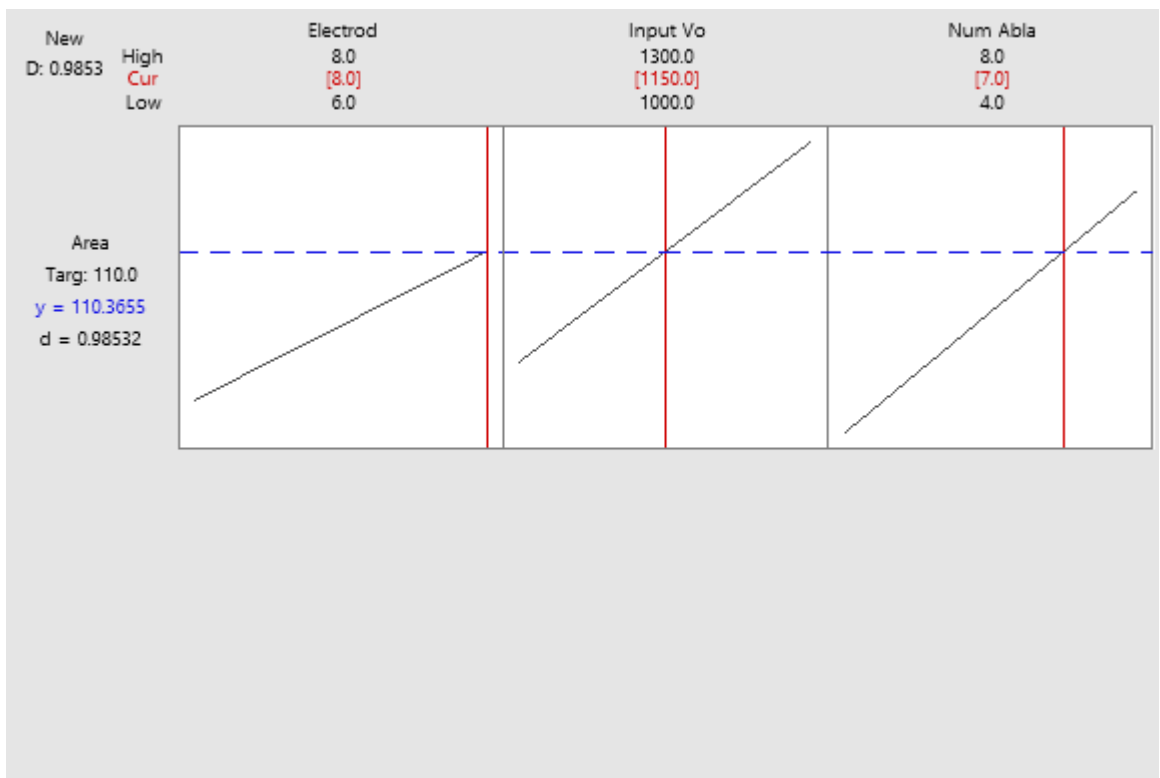

## S6: Confirmation Run Analysis (Prediction for Area @ 98.75%) – Minitab Analysis

### Regression Equation in Uncoded Units

Area = 118.4 - 18.50 Electrode Spacing c-c (mm) - 0.0231 Input Voltage (V)  
- 6.74 Num  
Ablation Repeats + 0.01301 Electrode Spacing c-c (mm)\*Input Voltage (V)  
+ 1.678 Electrode Spacing c-c (mm)\*Num Ablation Repeats

*Equation averaged over blocks.*

### Settings

| Variable                   | Setting |
|----------------------------|---------|
| Electrode Spacing c-c (mm) | 8       |
| Input Voltage (V)          | 1000    |
| Num Ablation Repeats       | 7       |

*Prediction is averaged over blocks.*

### Prediction

| Fit     | SE Fit  | 98.75% CI          | 98.75% PI          |
|---------|---------|--------------------|--------------------|
| 98.2171 | 1.95015 | (92.9327, 103.501) | (83.1672, 113.267) |

### Settings

| Variable                   | Setting |
|----------------------------|---------|
| Electrode Spacing c-c (mm) | 8       |
| Input Voltage (V)          | 1300    |
| Num Ablation Repeats       | 4       |

*Prediction is averaged over blocks.*

### Prediction

| Fit     | SE Fit  | 98.75% CI          | 98.75% PI          |
|---------|---------|--------------------|--------------------|
| 102.453 | 2.25184 | (96.3512, 108.555) | (87.0971, 117.809) |

### Settings

| Variable                   | Setting |
|----------------------------|---------|
| Electrode Spacing c-c (mm) | 8       |
| Input Voltage (V)          | 1000    |
| Num Ablation Repeats       | 4       |

*Prediction is averaged over blocks.*

### Prediction

| Fit     | SE Fit  | 98.75% CI          | 98.75% PI          |
|---------|---------|--------------------|--------------------|
| 78.1562 | 2.25184 | (72.0543, 84.2580) | (62.8002, 93.5122) |

### Settings

| Variable | Setting |
|----------|---------|
|----------|---------|



|                            |      |
|----------------------------|------|
| Electrode Spacing c-c (mm) | 8    |
| Input Voltage (V)          | 1150 |
| Num Ablation Repeats       | 7    |

*Prediction is averaged over blocks.*

## Prediction

| Fit     | SE Fit  | 98.75% CI          | 98.75% PI          |
|---------|---------|--------------------|--------------------|
| 110.366 | 1.45356 | (106.427, 114.304) | (95.7338, 124.997) |

## S7: Electrical Isolation Optimisation – Minitab Analysis

### Parameters

| Response             | Goal    | Lower  | Target  | Upper | Weight | Importance |
|----------------------|---------|--------|---------|-------|--------|------------|
| Centrewidth (manual) | Target  | 0.000  | 4.500   | 9.003 | 1      | 1          |
| Area                 | Maximum | 63.428 | 134.893 |       | 1      | 1          |

### Variable Ranges

| Variable                   | Values       |
|----------------------------|--------------|
| Electrode Spacing c-c (mm) | 8            |
| Input Voltage (V)          | (1000, 1300) |
| Num Ablation Repeats       | (4, 8)       |

### Solution

| Solution | Electrode Spacing c-c (mm) | Input Voltage (V) | Num Ablation Repeats | Centrewidth (manual) Fit | Area Fit | Composite Desirability |
|----------|----------------------------|-------------------|----------------------|--------------------------|----------|------------------------|
| 1        | 8                          | 1060.97           | 8                    | 4.5                      | 109.842  | 0.805895               |

### Multiple Response Prediction

| Variable                   | Setting |        |                  |                 |
|----------------------------|---------|--------|------------------|-----------------|
| Electrode Spacing c-c (mm) | 8       |        |                  |                 |
| Input Voltage (V)          | 1060.97 |        |                  |                 |
| Num Ablation Repeats       | 8       |        |                  |                 |
| Response                   | Fit     | SE Fit | 95% CI           | 95% PI          |
| Centrewidth (manual)       | 4.500   | 0.213  | (4.059, 4.941)   | (3.269, 5.731)  |
| Area                       | 109.84  | 1.99   | (105.72, 113.97) | (98.32, 121.36) |

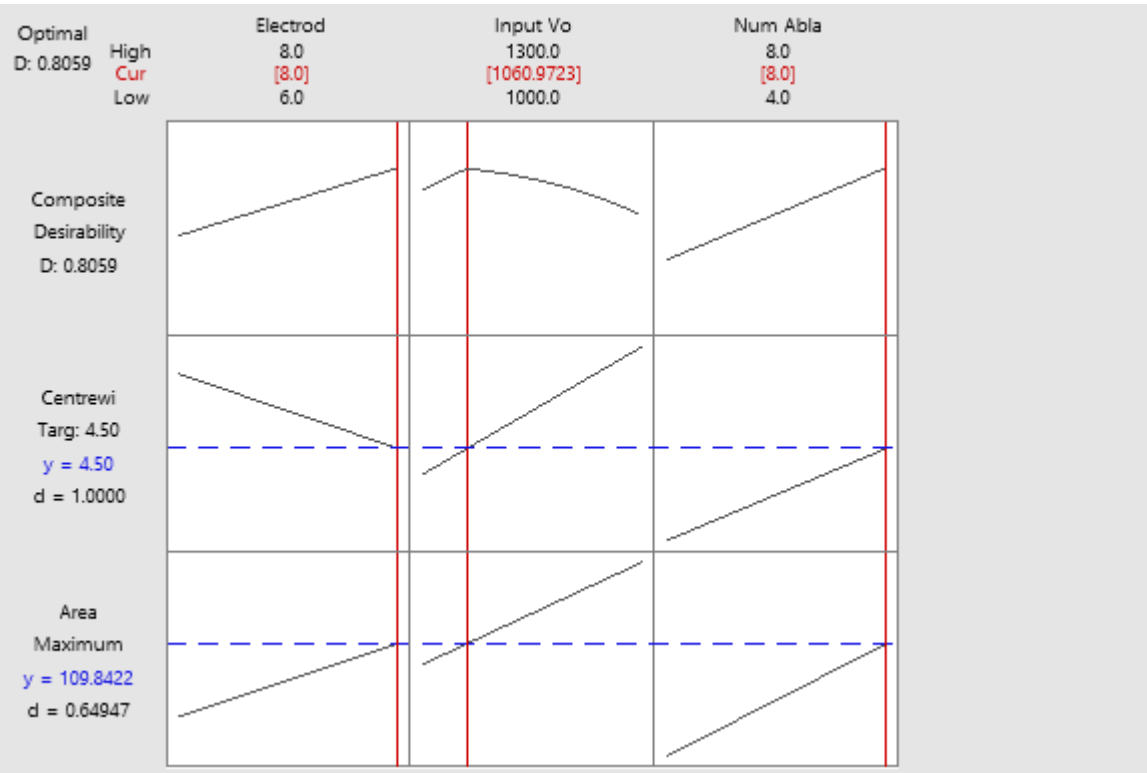

Supplement: s1 [file s1]
